# Supplementary material for: Resolving the electromagnetic mechanism of surface-enhanced light scattering at single hot spots
Source: PubMed Central journal article supplement — Nat Commun. 2012 Feb 21;3:684–. doi: 10.1038/ncomms1674 (PMC3293409; doi:10.1038/ncomms1674), 2012-02-21
Supplement: ncomms1674-s1.pdf [file ncomms1674-s1.pdf]

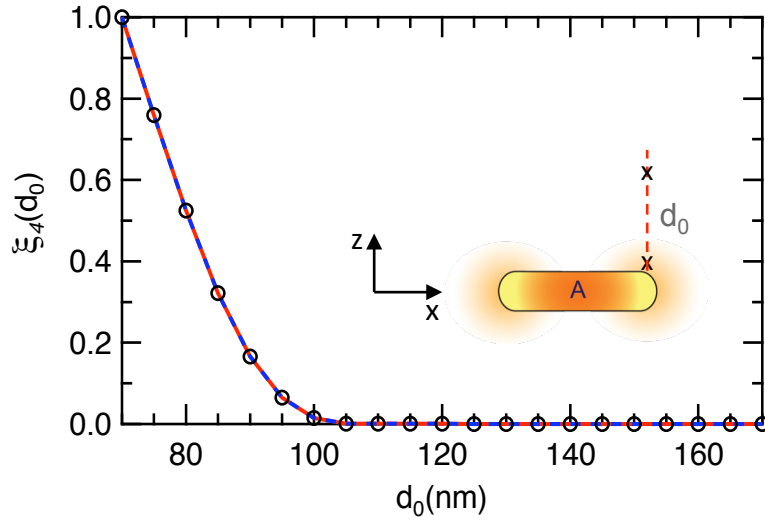

**Supplementary Figure S1.** Calculated 4-th order normalized Fourier coefficient  $\xi_4(d_0)$  as a function of the average antenna-tip distance  $d_0$ . The amplitude of the distance modulation  $\Delta d$  is 70nm, as in the experiment.  $\xi_4(d_0)$  is shown for three different antennas, one in resonance ( $L = 3.8\mu\text{m}$ , dashed blue line) and two out of resonance ( $L = 2.4\mu\text{m}$ , solid red line;  $L = 5\mu\text{m}$ , circles). The inset shows the location where  $\xi_4(d_0)$  is calculated. This behavior validates the assumption of equal decay of  $\xi_4(d_0)$  for all antennas.
